# Supplementary material for: Fabrication of porous α-Fe2O3nanoshuttles and their application for toluene sensors
Source: Royal Society of Chemistry journal article supplement (doi:10.1039/c4ra03743j), 2014-06-23
Supplement: c4ra03743j1.pdf [file c4ra03743j1.pdf]

Supporting Information

## Fabrication of porous $\alpha$ - $\text{Fe}_2\text{O}_3$ nanoshuttles and their application for toluene sensor

Shurong Wang\*, Yanshuang Wang, Hongxin Zhang, Liwei Wang, Xueling Gao, Jiedi Yang and Yao Wang

\* Tianjin Key Lab of Metal and Molecule-based Material Chemistry, Department of Chemistry, Nankai University, Tianjin, 300071, China.

Fax: +86-22-23502458;

Tel: +86-22-23505896;

E-mail: shrwang@nankai.edu.cn

### Supplementary Figures

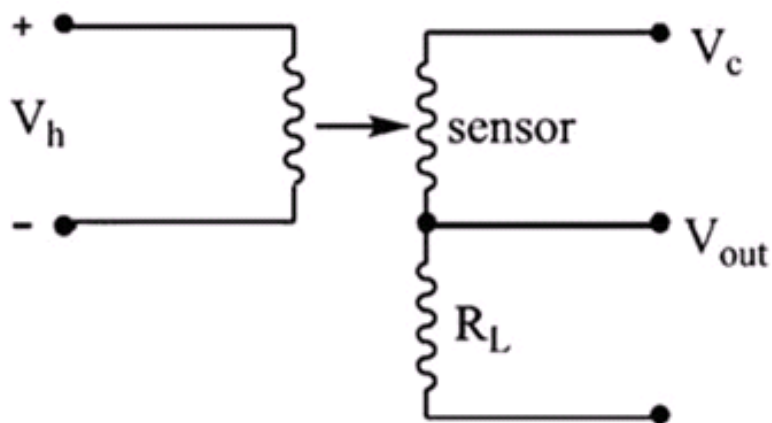

**Fig. S1.** The working principle of gas sensor test. ( $V_c$ : Test circuit voltage;  $V_h$ : Heating voltage;

$V_{out}$ : Output signal voltage;  $R_L$ : Load resistance).

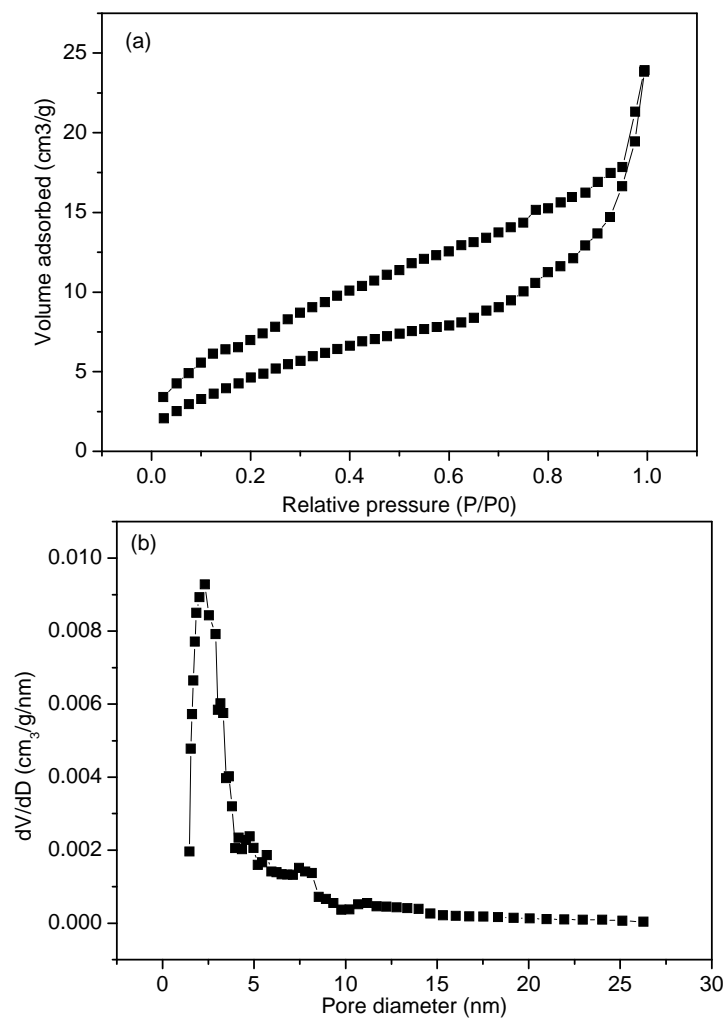

**Fig. S2.** (a) N<sub>2</sub> adsorption–desorption isotherm and (b) BJH pore-size distribution plot (b) of as-prepared  $\alpha$ -Fe<sub>2</sub>O<sub>3</sub> NSs.

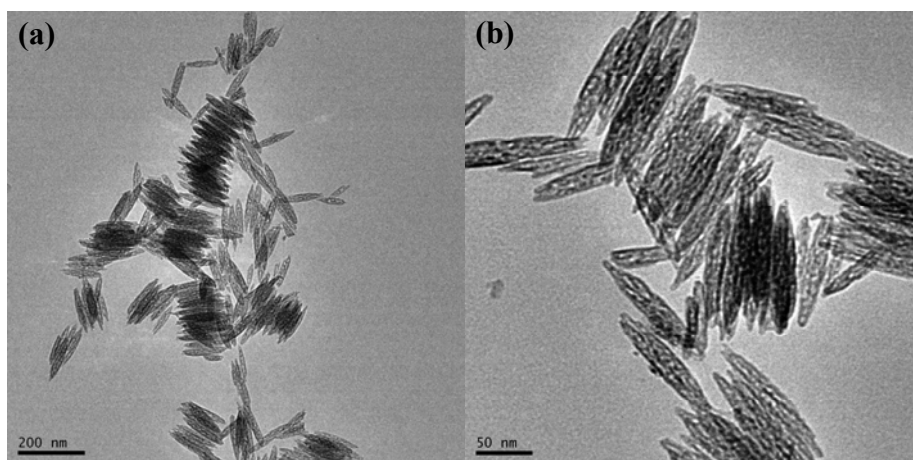

**Fig. S3.** (a) Low-magnification and (b) high-magnification TEM images of the  $\alpha$ -Fe<sub>2</sub>O<sub>3</sub> product prepared at 60 °C for 12h.

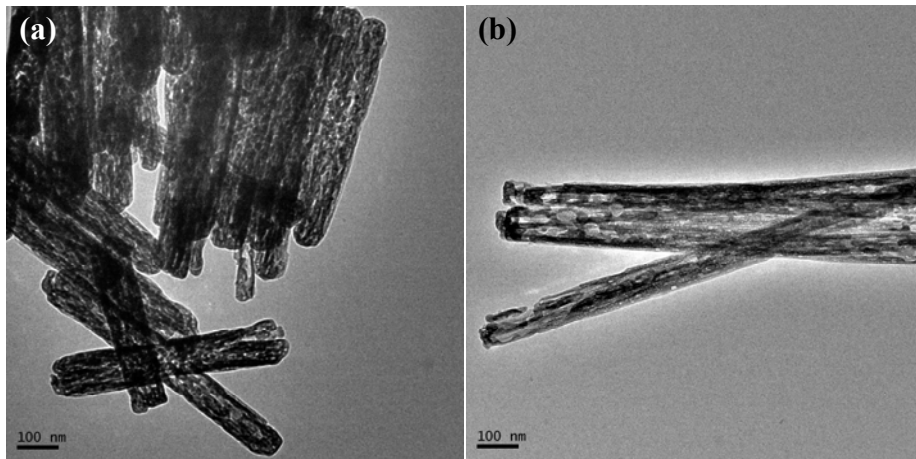

**Fig. S4.** (a) Low-magnification and (b) high-magnification TEM images of the  $\alpha$ -Fe<sub>2</sub>O<sub>3</sub> product prepared at 100 °C for 12h.
